# Quality control of large genome datasets using genome fingerprints

Max Robinson and Gustavo Glusman\*

Institute for Systems Biology, 401 Terry Ave N, Seattle, WA 98109, USA

\* Correspondence: [Gustavo@SystemsBiology.org](mailto:Gustavo@SystemsBiology.org)

Gustavo Glusman  
Institute for Systems Biology  
401 Terry Ave N  
Seattle, WA 98109, USA  
Tel: 206 732-1273

## Abstract

The 1000 Genomes Project is a foundational resource to modern human biomedicine, serving as a standard reference for human genetic variation. Recently, new versions of the 1000 Genomes Project dataset were released, expressed relative to the current version of the human reference sequence (GRCh38) and partially validated by benchmarking against reference truth sets from the Genome In A Bottle Consortium. We used our ultrafast genome comparison method (genome fingerprinting) to evaluate four versions of the 1000 Genomes Project datasets. These comparisons revealed several discrepancies in dataset membership, multiple cryptic relationships, overall changes in biallelic SNV counts, and more significant changes in SNV counts, heterozygosity and genotype concordance affecting a subset of the individuals. Based on these observations, we recommend performing global dataset comparisons, using genome fingerprints and other metrics, to supplement 'best practice' benchmarking relative to predefined truth sets.

## Background

Since its initial release, the 1000 Genomes Project [1] has served as the standard reference for human genetic variation, with multiple applications including population structure analyses, genotype imputation, association studies, evaluation of gene annotation, improving the reference genome itself, and much more [2]. To date, most analyses have relied on the phase 3 dataset, including 2504 individuals, mapped onto version GRCh37 (hg19) of the human reference genome, and released in 2013. We hereafter refer to this dataset as TGP37. The 2504 individuals in TGP37 were sampled from 26 populations, themselves drawn from five regions (Africa, East Asia, South Asia, Europe and the Americas). Genotypes for all individuals were estimated based on a combination of whole-genome sequencing, targeted exome sequencing and high-density SNP microarrays. The resulting variant calls included biallelic and multiallelic SNPs, indels and structural variants.

Not long after the initial release of TGP37 data, a new and much improved version of the human reference sequence, GRCh38 (hg38), was released, prompting efforts to express TGP phase 3 variation data relative to this new reference. Initially, TGP37 variants were translated to GRCh38 coordinates (via liftOver, <http://genome.ucsc.edu/cgi-bin/hgLiftOver>), yielding a dataset we call TGP38L. More recently, the raw genomic sequence reads were remapped onto GRCh38 [3] to support 'native' variant calling on the new reference [4]. Two versions of these variant calls have been released to date. The first, released in late 2018, was restricted to just biallelic SNVs; we call this dataset TGP38S. The second, released in early 2019, included biallelic SNVs and indels; we refer to this dataset as TGP38.

Despite the desirability of including only unrelated individuals in the TGP cohort, a number of close and more distant relationships exist within TGP37, as reported by us and others [5]. TGP37 is supplemented with a small set of 31 related samples, which we call TGP37r. Likewise, a set of 150 related samples accompanies TGP38S and TGP38 - we refer to these in turn as TGP38Sr and TGP38r.

Here, we evaluate the four versions of the TGP (TGP37, TGP38L, TGP38S and TGP38) and their associated related samples (TGP37r and TGP38r), in terms of (a) their relative composition (shared samples), (b) findings of known and cryptic relatedness as evidenced by genome fingerprint comparisons, (c) number of SNVs and level of heterozygosity observed in each individual genome, and (d) patterns of SNV loss and genotype concordance when comparing pairs of datasets.

## Results

### Overview

We demonstrate the application of genome fingerprints [5] for rapid evaluation of large genome datasets relative to each other on the four reported versions of the 1000 Genomes phase 3 data (Fig. 1): the original release (GRCh37), these variants lifted to GRCh38 (GRCh37L), as well as direct mappings of the reads with (GRCh38) and without (GRCh38S) indels reported (see Methods). We used genome fingerprints and other metrics to compare the SNVs reported in these genomes. Based on these analyses, we identified a number of discrepancies and quality issues, including a missing individual, additional cryptic relations, and a set of genomes with significantly fewer SNV counts.

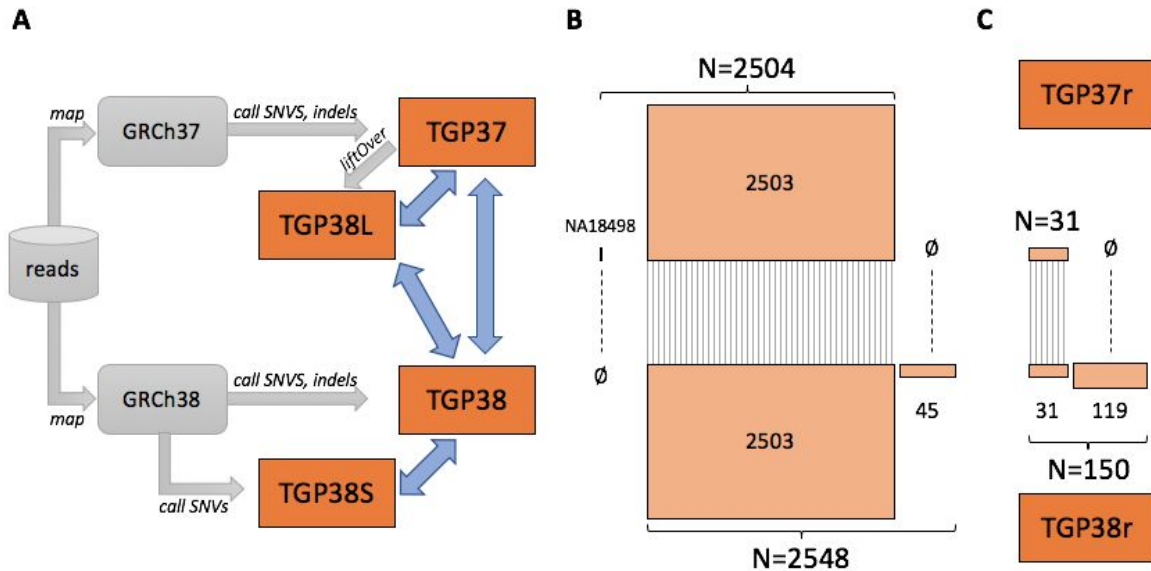

**Figure 1. Overview of the datasets. A)** Three methods were used to update the TGP genomes to GRCh38: liftOver (TGP38L) and remapping individual reads, followed by integrated variant calling resulting in SNVs (TGP38S) or SNV and indel calls (TGP38). These datasets were paired for comparison in four ways (blue double arrows) as discussed for each comparison. **B)** Cohort comparison. TGP37 and TGP38L contain the same 2504 genome identifiers; TGP38 and TGP38S contain the same 2548 identifiers, with 2503 identifiers in common. NA18498 is absent from TGP38/TGP38S, which contains 45 identifiers not in TGP37/TGP38L. **C)** The original set of 31 supplemental ‘related samples’ (TGP37r) has expanded to 150 (TGP38r).

### QC evaluation: TGP37 vs. TGP38

Correlation between genome fingerprints provides a rapid means to estimate relatedness [5], and we used this tool to verify that identical genome identifiers corresponded to the same individual across datasets. TGP37 and TGP38 appear to be corresponding datasets (SNV and indels called from direct mapping of the same reads to different reference genomes), however TGP38 differs from TGP37 by omission of one genome identifier (NA18498, population YRI) and inclusion of 45 additional identifiers (Table 1).

The highest fingerprint correlation between NA18498 and any individual from TGP38 is 0.316 (HG03108, ESN); among the 150 supplemental individuals in TGP38r, the highest correlation is 0.312 (HG03373, ESN). These values are well below the 0.75 minimal correlation expected for versions of the same individual, confirming that NA18498 is indeed absent from TGP38.

We evaluated the relatedness of the 45 additional individuals in TGP38 by fingerprint comparison to TGP37 and TGP38, and observed that most (75%) seem to be related to other individuals, some with fingerprint correlations consistent with second-degree relations (Table 1).

| ID      | Population code | TGP38 & TGP37 |             | TGP38, novel |             | ID      | Population code | TGP38 & TGP37 |             | TGP38, novel |             |
|---------|-----------------|---------------|-------------|--------------|-------------|---------|-----------------|---------------|-------------|--------------|-------------|
|         |                 | Nearest       | Correlation | Nearest      | Correlation |         |                 | Nearest       | Correlation | Nearest      | Correlation |
| NA18576 | CHB             | HG00530       | 0.521       | NA18527      | 0.515       | HG00312 | FIN             | HG00308       | 0.467       | NA20537      | 0.467       |
| NA18527 | CHB             | HG00530       | 0.514       | NA18576      | 0.515       | HG00303 | FIN             | HG00269       | 0.467       | HG00249      | 0.466       |
| HG02358 | CDX             | HG00530       | 0.506       | HG02405      | 0.498       | HG04301 | GBR             | HG00306       | 0.463       | HG00377      | 0.464       |
| HG02170 | CDX             | HG02152       | 0.506       | HG02173      | 0.498       | HG04303 | GBR             | NA11930       | 0.464       | NA20537      | 0.464       |
| HG02168 | CDX             | HG02396       | 0.505       | NA18576      | 0.503       | HG01471 | CLM             | HG02266       | 0.463       | HG00377      | 0.453       |
| HG02169 | CDX             | HG01797       | 0.505       | HG02173      | 0.496       | HG00359 | FIN             | HG00266       | 0.463       | HG00377      | 0.463       |
| HG02173 | CDX             | HG02389       | 0.502       | HG02168      | 0.502       | NA20831 | TSI             | NA11881       | 0.457       | HG00249      | 0.463       |
| HG02176 | CDX             | HG01802       | 0.502       | HG02170      | 0.497       | NA20829 | TSI             | HG00232       | 0.463       | HG00249      | 0.462       |
| HG02405 | CDX             | HG00844       | 0.501       | HG02358      | 0.498       | HG00135 | GBR             | HG01516       | 0.462       | HG00249      | 0.458       |
| HG00134 | GBR             | HG00142       | 0.499       | HG00249      | 0.460       | HG00156 | GBR             | HG00150       | 0.458       | NA20537      | 0.461       |
| NA18791 | CHB             | NA18960       | 0.498       | NA18576      | 0.496       | HG00337 | GBR             | HG00337       | 0.458       | NA20816      | 0.459       |
| NA18955 | JPT             | NA19005       | 0.497       | NA18576      | 0.493       | HG02436 | ACB             | HG02433       | 0.422       | HG00377      | 0.404       |
| HG00377 | FIN             | HG00329       | 0.481       | NA20873      | 0.492       | NA19359 | LWK             | NA19309       | 0.389       | NA19044      | 0.331       |
| NA20873 | GIH             | HG00232       | 0.457       | HG00377      | 0.492       | NA19044 | LWK             | HG01989       | 0.373       | HG02436      | 0.365       |
| NA20537 | TSI             | HG00232       | 0.469       | HG00377      | 0.491       | HG03398 | MSL             | NA19189       | 0.349       | NA19044      | 0.344       |
| NA20816 | TSI             | NA20516       | 0.482       | HG00377      | 0.472       | HG03393 | MSL             | HG03376       | 0.348       | HG03398      | 0.330       |
| HG00249 | GBR             | HG00232       | 0.481       | HG00377      | 0.482       | HG03431 | MSL             | NA19189       | 0.336       | HG03398      | 0.330       |
| NA21121 | GIH             | HG04001       | 0.467       | NA20883      | 0.480       | HG03171 | ESN             | NA18520       | 0.336       | NA19044      | 0.323       |
| NA20883 | GIH             | NA20854       | 0.462       | NA21121      | 0.480       | HG03549 | MSL             | HG02643       | 0.334       | HG03398      | 0.335       |
| HG00152 | GBR             | NA12287       | 0.467       | HG00377      | 0.470       | NA19371 | LWK             | NA19452       | 0.332       | NA19044      | 0.333       |
| HG00270 | FIN             | HG00269       | 0.466       | HG00377      | 0.469       | NA19398 | LWK             | HG02442       | 0.330       | NA19044      | 0.332       |
| HG00104 | GBR             | HG00157       | 0.461       | HG00377      | 0.468       | HG03462 | MSL             | HG03397       | 0.330       | HG03398      | 0.329       |
| HG00302 | FIN             | HG00373       | 0.466       | HG00377      | 0.468       |         |                 |               |             |              |             |

Table 1: The 45 additional individuals in TGP38, absent from TGP37. None of these individuals have any annotated relationships in IGSF, but 34 have fingerprint correlations of at least 45% to other individuals in TGP38.

Fingerprint-based comparisons of the 2503 individuals shared between TGP37 and TGP38 confirms a one-to-one relationship: for each individual in TGP37 (excluding NA18498, discussed above), the highest correlation observed was to the TGP38 individual with the same identifier. For 2495 of these, the correlation is well above 0.75, as expected. On the other hand, the remaining eight individuals all from the ACB population (Table 2), have between-set correlations in the 0.55-0.60 range, which we previously found to be consistent with first-degree relationships [5]. An additional eight individuals are more minor outliers: their fingerprint correlations (ranging from 0.787 to 0.865) are above the 0.75 cutoff for recognizing them as the same individual, but are much lower than observed for other genomes in the dataset (0.885 +/- 0.0028).

| Section           | ID      | Population code | Fingerprint correlation | SNV count |         | SNVs lost | Heterozygosity |       | Genotype concordance |
|-------------------|---------|-----------------|-------------------------|-----------|---------|-----------|----------------|-------|----------------------|
|                   |         |                 |                         | TGP37     | TGP38   |           | TGP37          | TGP38 |                      |
| missing           | NA18498 | YRI             | NA                      | 4281373   | 0       | 100.00%   | 65.8%          | NA    | NA                   |
| strongly affected | HG02325 | ACB             | 0.550                   | 4281515   | 3331950 | 22.18%    | 66.4%          | 57.3% | 0.578                |
|                   | HG02442 | ACB             | 0.554                   | 4261462   | 3349482 | 21.40%    | 65.9%          | 57.4% | 0.587                |
|                   | HG02433 | ACB             | 0.570                   | 4247360   | 3363226 | 20.82%    | 67.0%          | 58.4% | 0.600                |
|                   | HG01989 | ACB             | 0.571                   | 4204133   | 3334302 | 20.69%    | 66.6%          | 58.0% | 0.602                |
|                   | HG02445 | ACB             | 0.571                   | 4197022   | 3322449 | 20.84%    | 66.8%          | 57.9% | 0.601                |
|                   | HG02343 | ACB             | 0.585                   | 4192863   | 3347173 | 20.17%    | 67.2%          | 58.6% | 0.615                |
|                   | HG02420 | ACB             | 0.595                   | 4118119   | 3285587 | 20.22%    | 68.8%          | 59.1% | 0.626                |
|                   | HG01988 | ACB             | 0.603                   | 4044546   | 3261145 | 19.37%    | 67.6%          | 58.7% | 0.632                |
| mildly affected   | NA19189 | YRI             | 0.787                   | 4259509   | 3975543 | 6.67%     | 65.1%          | 63.9% | 0.871                |
|                   | HG00232 | GBR             | 0.814                   | 3476261   | 3263125 | 6.13%     | 60.8%          | 59.0% | 0.905                |
|                   | HG00530 | CHS             | 0.824                   | 3492719   | 3301091 | 5.49%     | 56.1%          | 54.9% | 0.919                |
|                   | HG00542 | CHS             | 0.827                   | 3487836   | 3292402 | 5.60%     | 56.4%          | 55.2% | 0.923                |
|                   | HG00531 | CHS             | 0.839                   | 3488432   | 3319043 | 4.86%     | 56.3%          | 55.5% | 0.938                |
|                   | NA18960 | JPT             | 0.840                   | 3547651   | 3362291 | 5.22%     | 56.9%          | 56.0% | 0.947                |
|                   | NA18856 | YRI             | 0.862                   | 4307564   | 4157373 | 3.49%     | 66.3%          | 66.2% | 0.965                |
|                   | HG00116 | GBR             | 0.865                   | 3507492   | 3379020 | 3.66%     | 60.5%          | 60.4% | 0.969                |
| reference         | NA12878 | CEU             | 0.885                   | 3516562   | 3437816 | 2.24%     | 60.5%          | 61.0% | 0.989                |
|                   | average | ACB (n=89)      | 0.887                   | 4261005   | 4174998 | 2.02%     | 66.9%          | 67.3% | 0.988                |
|                   | st.dev. | ACB (n=89)      | 0.0024                  | 33945     | 35464   | 0.13%     | 0.4%           | 0.4%  | 0.002                |
|                   | average | all (n=2487)    | 0.885                   | 3742994   | 3661305 | 2.19%     | 61.4%          | 61.9% | 0.988                |
|                   | st.dev. | all (n=2487)    | 0.0028                  | 327070    | 324064  | 0.17%     | 3.6%           | 3.5%  | 0.002                |

Table 2. Observed statistics for the outlier individuals most affected by dataset recomputation from TGP37 to TGP38, in comparison to the 'platinum' NA12878 genome, the 89 ACB individuals unaffected by this bioinformatic difference, and the 2487 similarly unaffected individuals in the entire cohort.

To evaluate the nature of these discrepancies, we tabulated the number of biallelic autosomal SNVs observed for each individual genome in each of the four datasets. We observed a reduction of ~2% of total SNV count for most individuals (Table 2). This reduction could be explained by changes in the reference, including reference/alternate allele switches and improved variant calling leading to fewer false positives. The 8 'mildly affected' individuals lost 3.5%-6.7% of SNVs. In contrast, the 8 ACB individuals described above lost 20-22% of SNVs - a very large reduction, not easily accountable for. While this could be a correction of variant miscalls in TGP37, it could also reflect false negative calls in TGP38. We compared the SNV counts of these eight individuals to those of the remaining 89 ACB individuals (Fig. 2) and observed that the TGP37 SNV counts of the eight strongly affected ACB individuals are consistent with the rest of this population, but they are outliers in terms of TGP38 SNV counts. We further tabulated the heterozygosity fraction for each individual and observed, again, that the eight strongly affected ACB individuals become low-heterozygosity outliers relative to their population, when transitioning from TGP37 to TGP38 (Table 2). Finally, we computed the concordance of the reported genotypes for each individual, i.e., in what fraction of SNVs the individual is deemed heterozygous in both datasets (ignoring phasing information), or homozygous for the alternate allele, out of the total number of SNVs in which the individual is not homozygous for the reference allele. We again observed markedly reduced genotype concordance for these individuals.

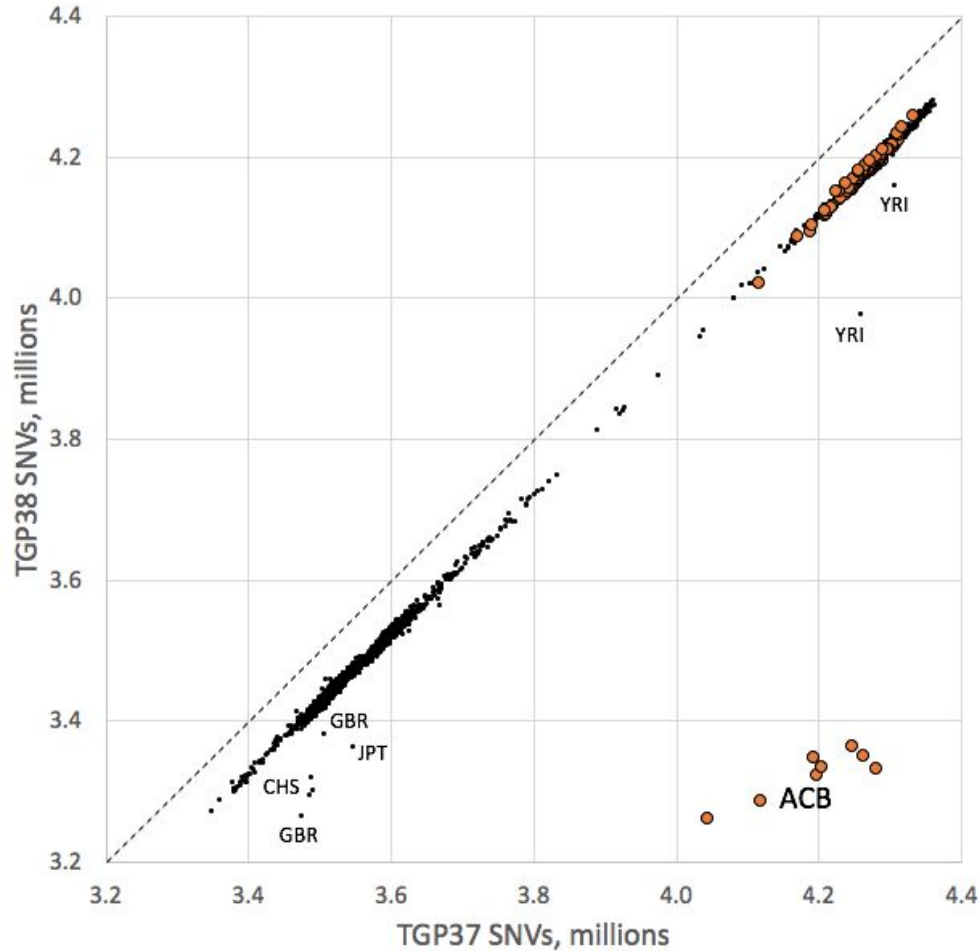

Figure 2. Biallelic autosomal SNV counts in TGP37 and TGP38. ACB individuals are highlighted with orange circles; the eight strongly affected ACB individuals are clearly most different from other ACB individuals in terms of TGP38 SNV counts. Other outliers are labeled with their assigned populations.

### Evaluation of the related individuals: TGP38 vs. TGP38r

We evaluated the degree of relatedness of the 150 'related individuals' in TGP38r, expecting all of them to show some degree of relatedness to at least one of the individuals in TGP38. We computed fingerprints for all TGP38r individuals, then compared them to all TGP38 individuals and to each other (Table 3). Over two thirds of the TGP38r individuals can indeed be recognized as closely related to TGP38 individuals, with fingerprint correlations above 0.45. On the other hand, at least 28 of the TGP38r individuals seem not to be related to anyone else in TGP38 or to each other (by correlation < 0.4) and thus could have been included in the TGP38 set.

| ID      | Population code | TGP38r to TGP38 |             | TGP38r  |             | ID      | Population code | TGP38r to TGP38 |             | TGP38r  |             |
|---------|-----------------|-----------------|-------------|---------|-------------|---------|-----------------|-----------------|-------------|---------|-------------|
|         |                 | Nearest         | Correlation | Nearest | Correlation |         |                 | Nearest         | Correlation | Nearest | Correlation |
| HG03982 | STU             | HG03858         | 0.868       | HG03761 | 0.430       | HG03383 | MSL             | HG03391         | 0.432       | HG03508 | 0.323       |
| HG00512 | CHS             | HG00524         | 0.710       | HG00501 | 0.687       | HG01452 | CLM             | HG01961         | 0.430       | HG01983 | 0.428       |
| HG00578 | CHS             | HG00581         | 0.707       | HG00635 | 0.689       | HG03454 | MSL             | HG03457         | 0.389       | NA19150 | 0.335       |
| HG00501 | CHS             | HG00524         | 0.701       | HG00512 | 0.687       | NA20344 | ASW             | NA20340         | 0.371       | HG01274 | 0.340       |
| HG02046 | KHV             | HG02067         | 0.701       | HG00866 | 0.490       | HG03574 | MSL             | HG03556         | 0.370       | HG03373 | 0.330       |
| HG00577 | CHS             | HG00584         | 0.697       | HG00418 | 0.501       | HG03566 | MSL             | HG03547         | 0.364       | HG03454 | 0.329       |
| HG02381 | CDX             | HG02373         | 0.694       | HG00427 | 0.489       | NA19150 | YRI             | HG02325         | 0.363       | NA20361 | 0.347       |
| HG00635 | CHS             | HG00581         | 0.676       | HG00578 | 0.689       | HG03034 | GWD             | HG02464         | 0.334       | HG03033 | 0.349       |
| NA20526 | TSI             | NA20792         | 0.678       | NA07346 | 0.453       | HG03033 | GWD             | HG02861         | 0.342       | HG03034 | 0.349       |
| HG03948 | STU             | HG03673         | 0.674       | HG04053 | 0.441       | HG03339 | ESN             | HG03366         | 0.342       | HG03361 | 0.347       |
| HG00983 | CDX             | HG00978         | 0.665       | HG00866 | 0.511       | HG03361 | ESN             | HG03342         | 0.334       | HG03339 | 0.347       |
| HG02372 | CDX             | HG02371         | 0.659       | HG00866 | 0.502       | HG02762 | GWD             | HG02643         | 0.345       | HG03373 | 0.335       |
| HG02024 | KHV             | HG02026         | 0.659       | HG00427 | 0.495       | HG03250 | GWD             | HG03246         | 0.345       | HG03249 | 0.340       |
| HG00702 | CHS             | HG00657         | 0.656       | HG00866 | 0.496       | HG03493 | ESN             | HG03511         | 0.345       | HG03373 | 0.335       |
| HG00866 | CDX             | HG00867         | 0.645       | HG00427 | 0.515       | HG03373 | ESN             | NA19130         | 0.344       | NA19150 | 0.342       |
| NA20898 | GIH             | NA20886         | 0.635       | HG03723 | 0.444       | HG03306 | ESN             | HG03514         | 0.344       | HG03307 | 0.332       |
| NA20871 | GIH             | NA20868         | 0.631       | HG03723 | 0.452       | HG03307 | ESN             | HG03398         | 0.343       | NA19150 | 0.342       |
| NA12891 | CEU             | NA12878         | 0.626       | NA12892 | 0.464       | HG03312 | ESN             | NA19147         | 0.343       | HG03249 | 0.336       |
| HG00153 | GBR             | HG00158         | 0.624       | NA11993 | 0.465       | HG03309 | ESN             | HG03193         | 0.343       | NA18487 | 0.341       |
| HG00733 | PUR             | HG00732         | 0.623       | NA11993 | 0.443       | HG03249 | GWD             | HG02678         | 0.343       | HG03250 | 0.340       |
| NA19685 | MXL             | NA19661         | 0.623       | NA19660 | 0.611       | NA18487 | YRI             | NA18934         | 0.339       | HG03309 | 0.341       |
| NA19675 | MXL             | NA19678         | 0.616       | NA11993 | 0.446       | HG02869 | GWD             | HG02896         | 0.341       | NA20361 | 0.336       |
| HG03715 | ITU             | HG03713         | 0.616       | HG03723 | 0.448       | HG02965 | ESN             | HG02981         | 0.341       | HG03249 | 0.335       |
| NA12892 | CEU             | NA12878         | 0.612       | NA11993 | 0.474       | HG03508 | ESN             | HG03199         | 0.339       | HG02964 | 0.334       |
| NA19660 | MXL             | NA19664         | 0.513       | NA19685 | 0.611       | HG03076 | MSL             | NA19129         | 0.339       | HG03569 | 0.335       |
| NA20336 | ASW             | NA20334         | 0.603       | NA11993 | 0.350       | HG02964 | ESN             | HG03193         | 0.339       | HG03508 | 0.334       |
| NA19373 | LWK             | NA19374         | 0.600       | NA19150 | 0.334       | HG02478 | ACB             | NA18858         | 0.338       | NA19150 | 0.337       |
| NA20341 | ASW             | NA20289         | 0.597       | HG01274 | 0.331       | HG03582 | MSL             | HG03398         | 0.333       | NA19150 | 0.337       |
| NA19470 | LWK             | NA19443         | 0.596       | NA19469 | 0.538       | HG03569 | MSL             | NA18915         | 0.336       | HG03076 | 0.335       |
| NA19396 | LWK             | NA19397         | 0.588       | NA19444 | 0.330       | HG03408 | MSL             | HG03115         | 0.334       | NA19150 | 0.330       |

Table 3. Sixty of 150 related individuals in TGP38r. Left side: top 30 by similarity to TGP38 or to other TGP38r individuals, starting with the HG03982-HG03858 pair discussed in the text. Right side: bottom 30 by similarity to TGP38 or to other TGP38r individuals, showing correlations consistent with no close family relationships.

One of the ‘related individuals’ in TGP38r (HG03982, STU) has fingerprint correlation of 0.868 to an individual in TGP38 (HG03858, STU). This fingerprint correlation would suggest these are the same individual, and yet HG03858 is annotated as female in IGSR, but HG03982 is annotated as male in IGSR. There is no annotation that either of these individuals having any relatives in either dataset, nor can we identify any relatives by fingerprint comparison. We considered various hypotheses, including whether these individuals could be sex-discordant monozygotic twins (as a result of sex change, through differential resolution of XXY karyotype, mosaicism, etc.), the result of mislabeling of twin samples, or mislabeled, redundant samples of the same individual.

TGP37 data support HG03858 being genetically female, with two copies of chrX and no chrY. We evaluated whether HG03982 could indeed be a male sample as annotated. No chrY data were released for TGP38r, and chrX data are available only in the pseudoautosomal regions (PARs, which combine data from chrX and chrY). We compared the genotype calls in the PARs of HG03858 and HG03982 and observed 91.8% genotype concordance, consistent with these being the same person. We evaluated the coverage levels along chrY for both samples (from low-coverage data) and found that both are consistent with the absence of chrY. We further computed chromosome-specific fingerprints, including for the PARs. The resulting 0.928 correlation of PAR-specific fingerprints suggests these two samples have the same karyotype

(XX) and the same chrX haplotypes, consistent with being sisters or the same individual. For comparison, we observe 0.954 correlation of PAR-specific fingerprints of samples HG00578 and HG00635 (both female siblings, with overall autosomal fingerprint correlation of 0.689), and 0.622 correlation of samples HG00512 and HG00501 (male and female siblings, respectively, with overall autosomal fingerprint correlation of 0.687).

We conclude that these two samples are both genetically female. Lacking further information about the individual(s), we hypothesize that HG03982 may have been annotated as male as a result of a clerical error.

### Other dataset comparisons

We extended the genome fingerprint correlation analysis of the final datasets (TGP37 vs. TGP38, described above) to evaluate (1) the effect of lifting over variants from one reference version to another (TGP37 vs. TGP38L), (2) the concordance of such lifting with native mapping and variant calling on the new reference (TGP38L vs. TGP38) and (3) the effect of variant calling retaining only biallelic SNVs or both biallelic SNVs and indels (TGP38S vs. TGP38). These four comparisons yield quite distinct distributions of correlations, with variable numbers of outliers (Fig. 3).

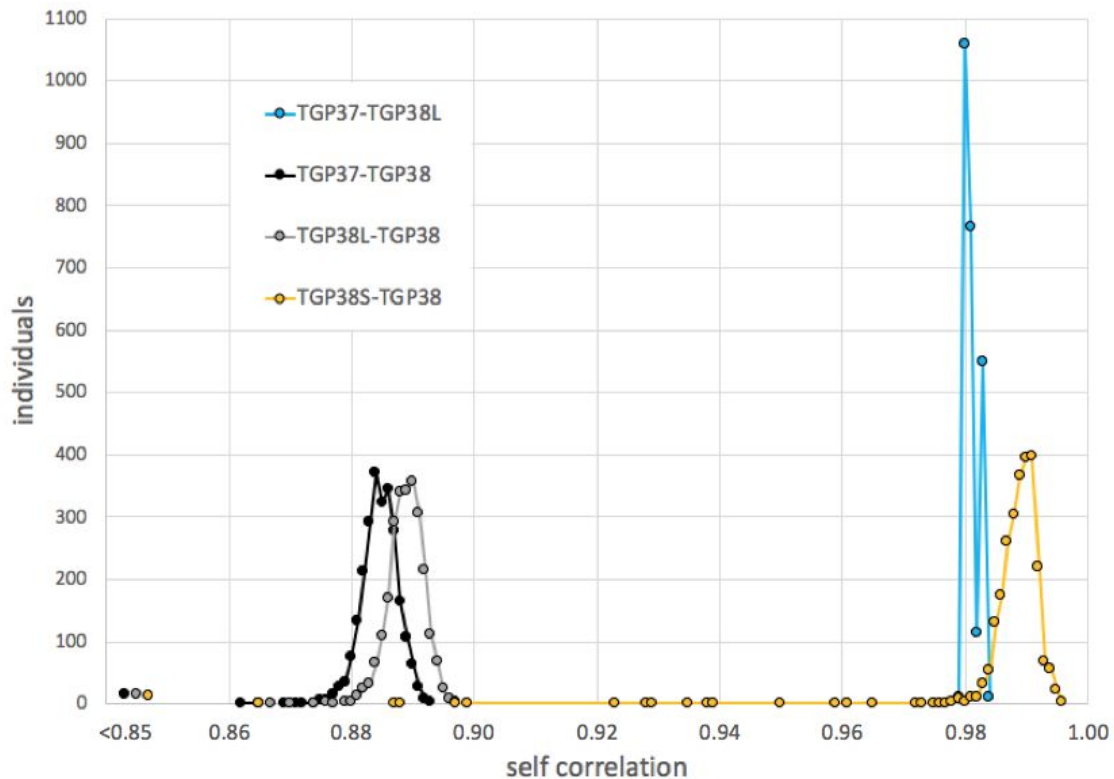

Figure 3. Distributions of self-correlations across datasets.

As expected, lifting variants over from one reference to the other yields the most uniform results (blue curve in Fig. 3), with no outliers. The ~2% loss in correlation is largely due to some degree of variant loss in regions that could not be lifted over, and a small rate of ‘reference switches’ in which the alternate allele in GRCh37 becomes the reference allele in GRCh38.



The concordance between variant lifting and native mapping (gray curve in Fig. 3) is similar to (and slightly higher than) that of the final datasets (black curve in Fig. 3), with the same set of outliers. The slightly higher concordance can again be attributed to a more consistent set of variants included, and fewer reference/alternate allele discrepancies.

When comparing the two versions of native variant calling on the new reference, with or without indels, the correlations are highest as expected (orange curve in Fig. 3). Surprisingly, this comparison yields the largest number of outliers (32 individuals), including all outliers observed when comparing TGP37 and TGP38 (16 individuals). These 32 outliers have significantly reduced genome fingerprint correlations and genotype concordances (Table 4).

| Section           | ID      | Population code | Fingerprint correlation | SNV count |         | SNVs lost | Heterozygosity |       | Genotype concordance |
|-------------------|---------|-----------------|-------------------------|-----------|---------|-----------|----------------|-------|----------------------|
|                   |         |                 |                         | TGP38S    | TGP38   |           | TGP38S         | TGP38 |                      |
| strongly affected | HG02436 | ACB             | 0.727                   | 3496464   | 3349895 | 4.19%     | 58.8%          | 57.5% | 0.689                |
|                   | HG02325 | ACB             | 0.730                   | 3481154   | 3331950 | 4.29%     | 58.6%          | 57.3% | 0.683                |
|                   | HG02442 | ACB             | 0.731                   | 3499931   | 3349482 | 4.30%     | 58.7%          | 57.4% | 0.686                |
|                   | HG01989 | ACB             | 0.739                   | 3481183   | 3334302 | 4.22%     | 59.2%          | 58.0% | 0.696                |
|                   | HG02433 | ACB             | 0.740                   | 3508051   | 3363226 | 4.13%     | 59.6%          | 58.4% | 0.696                |
|                   | HG02445 | ACB             | 0.745                   | 3459846   | 3322449 | 3.97%     | 59.1%          | 57.9% | 0.697                |
|                   | HG02343 | ACB             | 0.749                   | 3489501   | 3347173 | 4.08%     | 59.9%          | 58.6% | 0.704                |
|                   | HG01988 | ACB             | 0.763                   | 3389432   | 3261145 | 3.78%     | 60.2%          | 58.7% | 0.715                |
|                   | HG02420 | ACB             | 0.764                   | 3409560   | 3285587 | 3.64%     | 60.7%          | 59.1% | 0.713                |
|                   | HG00377 | FIN             | 0.807                   | 3083904   | 3014303 | 2.26%     | 54.6%          | 53.7% | 0.747                |
|                   | NA19044 | LWK             | 0.815                   | 3919241   | 3796612 | 3.13%     | 63.9%          | 63.0% | 0.799                |
|                   | NA20873 | GIH             | 0.825                   | 3193470   | 3112562 | 2.53%     | 56.7%          | 55.5% | 0.777                |
|                   | NA20537 | TSI             | 0.865                   | 3272135   | 3192729 | 2.43%     | 58.0%          | 56.5% | 0.838                |
|                   | NA19189 | YRI             | 0.887                   | 4055238   | 3975543 | 1.97%     | 64.5%          | 63.9% | 0.885                |
|                   | NA18527 | CHB             | 0.888                   | 3286549   | 3217439 | 2.10%     | 55.0%          | 53.8% | 0.863                |
|                   | NA20883 | GIH             | 0.897                   | 3374736   | 3310653 | 1.90%     | 59.3%          | 58.2% | 0.885                |
| NA21121           | GIH     | 0.899           | 3368293                 | 3303995   | 1.91%   | 59.4%     | 58.2%          | 0.885 |                      |
| mildly affected   | HG00232 | GBR             | 0.923                   | 3308075   | 3263125 | 1.36%     | 59.8%          | 59.0% | 0.919                |
|                   | HG03398 | MSL             | 0.928                   | 4178239   | 4135437 | 1.02%     | 66.0%          | 65.6% | 0.933                |
|                   | HG00249 | GBR             | 0.929                   | 3314289   | 3272920 | 1.25%     | 59.8%          | 59.1% | 0.923                |
|                   | HG00530 | CHS             | 0.935                   | 3332144   | 3301091 | 0.93%     | 55.4%          | 54.9% | 0.932                |
|                   | HG00542 | CHS             | 0.938                   | 3325805   | 3292402 | 1.00%     | 55.7%          | 55.2% | 0.937                |
|                   | NA18576 | CHB             | 0.939                   | 3357895   | 3323353 | 1.03%     | 56.4%          | 55.9% | 0.936                |
|                   | HG00531 | CHS             | 0.950                   | 3343457   | 3319043 | 0.73%     | 55.8%          | 55.5% | 0.950                |
|                   | NA18960 | JPT             | 0.959                   | 3383189   | 3362291 | 0.62%     | 56.2%          | 56.0% | 0.961                |
|                   | NA20816 | TSI             | 0.961                   | 3390396   | 3372127 | 0.54%     | 60.6%          | 60.3% | 0.965                |
|                   | NA18856 | YRI             | 0.965                   | 4178400   | 4157373 | 0.50%     | 66.3%          | 66.2% | 0.969                |
|                   | HG00116 | GBR             | 0.972                   | 3394446   | 3379020 | 0.45%     | 60.5%          | 60.4% | 0.975                |
|                   | NA19468 | LWK             | 0.973                   | 4177198   | 4170318 | 0.16%     | 66.6%          | 66.5% | 0.980                |
|                   | NA19436 | LWK             | 0.975                   | 4177601   | 4170177 | 0.18%     | 66.8%          | 66.8% | 0.980                |
|                   | NA19456 | LWK             | 0.976                   | 4182394   | 4176973 | 0.13%     | 66.8%          | 66.8% | 0.982                |
| NA19431           | LWK     | 0.977           | 4191962                 | 4185700   | 0.15%   | 66.5%     | 66.5%          | 0.982 |                      |
| reference         | NA12878 | CEU             | 0.991                   | 3439095   | 3437816 | 0.04%     | 61.1%          | 61.0% | 0.992                |
|                   | average | ACB (n=88)      | 0.989                   | 4176746   | 4174998 | 0.04%     | 67.3%          | 67.3% | 0.991                |
|                   | st.dev. | ACB (n=88)      | 0.0028                  | 35037     | 35464   | 0.03%     | 0.4%           | 0.4%  | 0.002                |
|                   | average | all (n=2516)    | 0.989                   | 3662368   | 3660580 | 0.05%     | 61.9%          | 61.9% | 0.991                |
|                   | st.dev. | all (n=2516)    | 0.0027                  | 324263    | 324333  | 0.04%     | 3.5%           | 3.5%  | 0.002                |

Table 4. Observed statistics for the outlier individuals most affected by variant calling including or excluding indels (TGP38S vs. TGP38), in comparison to the 'platinum' NA12878 genome, the 88 ACB individuals unaffected by this bioinformatic difference, and the 2516 similarly unaffected individuals in the entire cohort.

## Discussion

We presented here the application of genome fingerprints [5] for quick and simple comparison of four versions of the TGP, expressed relative to two versions of the reference genome (GRCh37 and GRCh38). In addition to the overall comparison of the full datasets (TGP37 vs. TGP38, and related samples), other pairwise comparisons of these versions provided insights into the effects of lifting over variants from one reference version to the other (TGP37 vs. TGP38L), of lifting over vs. native mapping and variant calling (TGP38L vs. TGP38), and of different variant calling procedures (TGP38 vs. TGP38S). Through these comparisons, we identified some discrepancies between the datasets, pointing at changes in the list of included genomes, some additional cryptic relationships, overall changes in biallelic SNV counts, and more significant changes in SNV counts, heterozygosity and genotype concordance affecting a subset of the individuals.

Best practices for benchmarking variant calls are largely based on the use of ‘truth set’ resources of the Genome In A Bottle (GIAB) Consortium [6–8]. Specifically, TGP38 was evaluated by comparing the variant call sets observed for the ‘platinum’ NA12878 genome, and computing false positive and false negative call rates in regions for which the GIAB considers calls to be high confidence [4]. We observe that such verification may be insufficient for global evaluation of large genome datasets including samples from diverse population backgrounds, which may be differentially affected by reference and software changes. As a partial way to mitigate this deficiency, we recommend performing global dataset comparisons using genome fingerprints and other general-purpose [9] or domain-specific metrics. Such ‘relative benchmarking’, in which each individual genome can serve as its own reference, can supplement ‘absolute benchmarking’ relative to truth sets. As a result of such relative benchmarking, multiple discrepancies may become evident that cannot be immediately resolved in the absence of a truth set; resolving such discrepancies would certainly necessitate further computational analyses and, in some cases, experimental testing.

## Materials and Methods

**Datasets.** We obtained four versions of the 1000 genomes dataset, phase 3:

1. **TGP37:** Variant calls relative to the GRCh37 (hg19) version of the human genome reference (N=2504). <ftp://ftp.1000genomes.ebi.ac.uk/vol1/ftp/release/20130502/>
2. **TGP38L:** Variant calls for the same set of genomes, “lifted over” to the GRCh38 (hg38) version of the human reference and using dbSNP v. 149 (N=2504). [http://ftp.1000genomes.ebi.ac.uk/vol1/ftp/release/20130502/supporting/GRCh38\\_positions/](http://ftp.1000genomes.ebi.ac.uk/vol1/ftp/release/20130502/supporting/GRCh38_positions/)
3. **TGP38:** A set of integrated phased biallelic SNP and indel calls, directly called against the GRCh38 (hg38) version of the human reference (N=2548). [http://ftp.1000genomes.ebi.ac.uk/vol1/ftp/data\\_collections/1000\\_genomes\\_project/release/20190312\\_biallelic\\_SNV\\_and\\_INDEL/](http://ftp.1000genomes.ebi.ac.uk/vol1/ftp/data_collections/1000_genomes_project/release/20190312_biallelic_SNV_and_INDEL/)
4. **TGP38S:** Integrated phased biallelic SNP calls, directly called against the GRCh38 (hg38) version of the human reference (N=2548). [http://ftp.1000genomes.ebi.ac.uk/vol1/ftp/data\\_collections/1000\\_genomes\\_project/release/20181203\\_biallelic\\_SNV/](http://ftp.1000genomes.ebi.ac.uk/vol1/ftp/data_collections/1000_genomes_project/release/20181203_biallelic_SNV/)

We also downloaded three sets of genomes of samples related to those in the main 1000 genomes dataset:

1. **TGP37r**: Integrated phased biallelic SNP and indel calls, relative to GRCh37 (N=31).  
[http://ftp.1000genomes.ebi.ac.uk/vol1/ftp/data\\_collections/1000\\_genomes\\_project/release/20181203\\_biallelic\\_SNV/supporting/related\\_samples/](http://ftp.1000genomes.ebi.ac.uk/vol1/ftp/data_collections/1000_genomes_project/release/20181203_biallelic_SNV/supporting/related_samples/)
2. **TGP38r**: Integrated phased biallelic SNP and indel calls, relative to GRCh38 (N=150).  
[http://ftp.1000genomes.ebi.ac.uk/vol1/ftp/data\\_collections/1000\\_genomes\\_project/release/20190312\\_biallelic\\_SNV\\_and\\_INDEL/supporting/related\\_samples/](http://ftp.1000genomes.ebi.ac.uk/vol1/ftp/data_collections/1000_genomes_project/release/20190312_biallelic_SNV_and_INDEL/supporting/related_samples/)
3. **TGP38Sr**: Integrated phased biallelic SNP calls, relative to GRCh38 (N=150).  
[http://ftp.1000genomes.ebi.ac.uk/vol1/ftp/data\\_collections/1000\\_genomes\\_project/release/20181203\\_biallelic\\_SNV/supporting/related\\_samples/](http://ftp.1000genomes.ebi.ac.uk/vol1/ftp/data_collections/1000_genomes_project/release/20181203_biallelic_SNV/supporting/related_samples/)

**Whole-genome fingerprinting.** We computed fingerprints for all genomes in all sets as described [5], with  $L=200$ . Unless otherwise specified, all genome fingerprints include only biallelic autosomal SNVs. This computation does not include the pseudoautosomal regions (PARs) of chromosomes X and Y.

**Chromosome fingerprinting.** To compute single-chromosome fingerprints, we restricted SNV pair collection to each chromosome and normalized the single-chromosome raw fingerprints separately, yielding single-chromosome normalized fingerprints. Other than restricting the range to the individual chromosome, the procedure is identical to that used for computing whole-genome fingerprints. We applied this procedure also to the PARs.

**Other metrics.** We computed the *SNV count* of an individual as the number of biallelic SNVs observed in their genome in either heterozygous state or homozygous for the alternate allele. We computed the *heterozygosity* of an individual as the number of biallelic SNVs observed in their genome in heterozygous state, divided by their SNV count. We computed the *genotype concordance* of an individual between two datasets as the number of biallelic SNVs in which the individual is heterozygous in both two datasets (ignoring phasing of heterozygous sites) or homozygous alternate allele in both datasets, divided by the total number of biallelic SNVs in which the individual was not homozygous reference in both datasets.

**Availability.** Genome fingerprints ( $L=200$ ) for all datasets are available through the genome fingerprints project website, [db.systemsbiology.net/gestalt/genome\\_fingerprints](http://db.systemsbiology.net/gestalt/genome_fingerprints). Code for computing genome fingerprints is available from [github.com/gglusman/genome-fingerprints](https://github.com/gglusman/genome-fingerprints).

## Abbreviations used

GIAB: Genome In A Bottle Consortium

GRCh37, GRCh38: Genome Reference Consortium, human reference versions 37 and 38

IGSR: International Genome Sample Resource, <http://www.internationalgenome.org>

SNV: Single-nucleotide variant

TGP: Thousand Genomes Project

TGP37, TGP37r, TGP38, TGP38L, TGP38r, TGP38S: The TGP datasets studied in this work

## Author contributions

GG conceived of the study. GG, MR performed analyses. GG, MR wrote the manuscript. All authors edited and approved its final version.

## Conflict of Interest Statement

GG and MR hold a patent application (WO2017210102A1) on the method used to generate and compare reduced genome datasets. GG holds stock options in Arivale, Inc. Arivale, Inc. did not fund the study and was not involved in its design, implementation, or reporting.

## References

1. 1000 Genomes Project Consortium, Auton A, Brooks LD, Durbin RM, Garrison EP, Kang HM, et al. A global reference for human genetic variation. *Nature*. 2015;526:68–74.
2. Zheng-Bradley X, Flicek P. Applications of the 1000 Genomes Project resources. *Brief Funct Genomics*. 2017;16:163–70.
3. Zheng-Bradley X, Streeter I, Fairley S, Richardson D, Clarke L, Flicek P, et al. Alignment of 1000 Genomes Project reads to reference assembly GRCh38. *Gigascience*. 2017;6:1–8.
4. Lowy-Gallego E, Fairley S, Zheng-Bradley X, Ruffier M, Clarke L, Flicek P, et al. Variant calling on the GRCh38 assembly with the data from phase three of the 1000 Genomes Project. *Wellcome Open Res*. 2019;4:50.
5. Glusman G, Mauldin DE, Hood LE, Robinson M. Ultrafast Comparison of Personal Genomes via Precomputed Genome Fingerprints. *Front Genet*. 2017;8:136.
6. Zook JM, Chapman B, Wang J, Mittelman D, Hofmann O, Hide W, et al. Integrating human sequence data sets provides a resource of benchmark SNP and indel genotype calls. *Nat Biotechnol*. Nature Publishing Group, a division of Macmillan Publishers Limited. All Rights Reserved.; 2014;32:246–51.
7. Krusche P, Trigg L, Boutros PC, Mason CE, De La Vega FM, Moore BL, et al. Best practices for benchmarking germline small-variant calls in human genomes. *Nat Biotechnol* [Internet]. 2019; Available from: <http://dx.doi.org/10.1038/s41587-019-0054-x>
8. Zook JM, McDaniel J, Olson ND, Wagner J, Parikh H, Heaton H, et al. An open resource for accurately benchmarking small variant and reference calls. *Nat Biotechnol* [Internet]. 2019; Available from: <http://dx.doi.org/10.1038/s41587-019-0074-6>
9. Deutsch EW, Kramer R, Ames J, Bauman A, Campbell DS, Chard K, et al. BDQC: a general-purpose analytics tool for domain-blind validation of Big Data [Internet]. *bioRxiv*. 2018 [cited 2019 Apr 4]. p. 258822. Available from: <https://www.biorxiv.org/content/10.1101/258822v1>
